# Supplementary material for: Type 2 Low Biomarker Stability and Exacerbations in Severe Uncontrolled Asthma
Source: MDPI journal article supplement (doi:10.3390/biom13071118), 2023-07-13
Supplement: s1 [file s1]

## Supplementary material

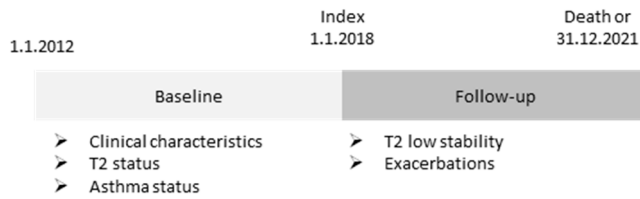

Figure S1. Study design.

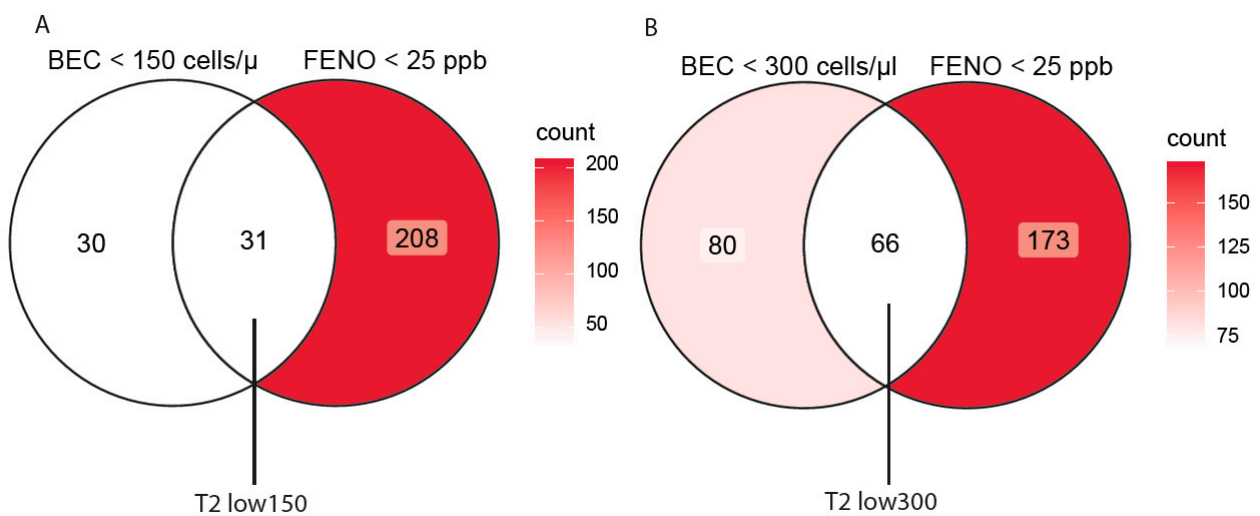

Figure S1. Number of patients with BEC < 150 cells/ $\mu$ l at least twice and FeNO < 25 ppb during baseline, and the overlap of these criteria for the formation of the T2 low<sub>150</sub> group (A). Number of patients with BEC < 300 cells/ $\mu$ l at least twice and FeNO < 25 ppb during baseline, and the overlap of these criteria for the formation of the T2 low<sub>300</sub> group (B). Patients in the T2 low<sub>150</sub> were included in the T2 low<sub>300</sub> group.
